# Supplementary material
Source: publisher figshare collection journal article supplement (https://tandf.figshare.com/articles/dataset/_/5592649)
Supplement: Supplementary file 1 [file 2]

**Supplementary Table 1** Elixhauser comorbidity score; a modification into a point system according to van Walraven et al. (19)

| Elixhauser comorbidity score; a modification into a point system according to van Walraven et al. (19) | |
| --- | --- |
| 0 | Hypertension, complicated and uncomplicated diabetes, hypothyroidism, peptic ulcer disease without bleeding, Rheumatoid arthritis/collagen vascular diseases, AIDS/HIV, alcohol abuse, psychosis |
| 2 | Peripheral vascular disorders |
| 3 | Chronic pulmonary disease, rheumatoid arthritis/collagen vascular diseases, coagulopathy |
| 4 | Pulmonary circulation disorders, **solid tumor without metastasis** |
| 5 | Cardiac arrhythmias, **renal failure**, fluid and electrolyte disorders |
| 6 | Neurodegenerative disorders, **weight loss** |
| 7 | Congestive heart failure, paralysis |
| 9 | Lymphoma |
| 11 | Liver disease |
| 12 | Metastatic cancer |
| -1 | Valvular disease |
| -2 | Blood loss anemia, deficiency anemia |
| -3 | Depression |
| -4 | Obesity |
| -7 | Drug abuse |
